# Supplementary material
Source: PubMed Central journal article supplement (PMC3921347)
Supplement: tableS1.pdf [file tableS1.pdf]

**Supplementary table 1. A total of 125 differentially expressed miRNAs in psoriatic involved and psoriatic uninvolved skin with respect to the normal human skin. miRtron and noncanonical miRNAs are highlighted in blue.**

| Mature miRNA         | Sequence                | Normalized no. reads |                 |                 | Fold change |       |       | Total reads |
|----------------------|-------------------------|----------------------|-----------------|-----------------|-------------|-------|-------|-------------|
|                      |                         | NN <sup>a</sup>      | PN <sup>a</sup> | PP <sup>a</sup> | PP/NN       | PP/PN | PN/NN |             |
| hsa-mir-31.iso1      | GCTATGCCAACATATTGCCATC  | 10.94                | 18.91           | 694.01          | 63.43       | 36.71 | 1.73  | 723.86      |
| hsa-miR-31           | AGGCAAGATGCTGGCATAGCT   | 1063.44              | 3255.25         | 45690.24        | 42.93       | 14.03 | 3.06  | 55883       |
| hsa-miR-31*          | TGCTATGCCAACATATTGCCAT  | 250.54               | 358.19          | 8679.14         | 34.51       | 24.17 | 1.43  | 10412       |
| hsa-miR-206          | TGGAATGTAAGGAAGTGTGTGG  | 119.25               | 317.23          | 1538.82         | 12.80       | 4.84  | 2.65  | 2156        |
| hsa-miR-6732/miRtron | TAACCCTGTCCTCTCCCTCCCAG | 1.00                 | 2.05            | 11.58           | 11.58       | 5.65  | 2.05  | 14.63       |
| hsa-miR-21*          | CAACACCAGTCGATGGGCTGT   | 712.24               | 1032.56         | 6278.75         | 8.80        | 6.08  | 1.45  | 8754        |
| hsa-miR-135b*        | ATGTAGGGCTAAAAGCCATGGG  | 62.36                | 66.18           | 506.18          | 8.00        | 7.55  | 1.06  | 694         |
| miR-937/miRtron      | ATCCGCGCTCTGACTCTTGCC   | 3.19                 | 2.05            | 20.40           | 6.40        | 9.95  | -1.56 | 25.64       |
| hsa-miR-33b*         | CAGTGCCTCGGCAGTGCAGCCC  | 61.27                | 67.23           | 353.62          | 5.70        | 5.20  | 1.10  | 521         |
| hsa-miR-135b         | TATGGCTTTTCATTCTATGTGA  | 643.31               | 682.77          | 3636.74         | 5.65        | 5.32  | 1.06  | 5362        |
| hsa-mir-455.iso1     | TGCAGTCCATGGGCATATACAC  | 481.39               | 563.03          | 2711.68         | 5.63        | 4.82  | 1.17  | 3756.10     |
| hsa-miR-222*         | CTCAGTAGCCAGTGTAGATCCT  | 440.91               | 736.34          | 2467.41         | 5.59        | 3.35  | 1.67  | 3902        |
| miR-1983/tRNAIle     | CTCACCTGGAGCATGTTTTCT   | 23.98                | 25.16           | 117.40          | 4.90        | 4.67  | 1.05  | 166.54      |
| hsa-miR-1268         | CGGGCGTGGTGGTGGGGG      | 1514.20              | 2227.94         | 6745.25         | 4.45        | 3.03  | 1.47  | 11154       |
| Novel #6             | TAAAAGTAATTGTGGTATTTGC  | 303.06               | 370.80          | 1246.93         | 4.10        | 3.36  | 1.22  | 2044        |
| hsa-miR-21           | TAGCTTATCAGACTGATGTTGA  | 4091259.64           | 4176278.01      | 16177715.35     | 3.95        | 3.87  | 1.02  | 26060562    |
| hsa-miR-431          | TGTCTTGACAGCCGTCATGCA   | 44.86                | 54.62           | 178.13          | 3.91        | 3.22  | 1.21  | 295         |
| hsa-mir-146a.iso1    | TTGAGAACTGAATCCATGGGT   | 1101.73              | 1510.50         | 4294.59         | 3.90        | 2.84  | 1.37  | 6906.83     |
| hsa-miR-4772         | TCTGATCAGGCAAATTGCAG    | 77.68                | 68.28           | 296.30          | 3.78        | 4.29  | -1.14 | 472         |
| miRtron #144/miRtron | TTTGCTAACTTTCTTTTCCAAG  | 22.88                | 25.16           | 79.48           | 3.47        | 3.16  | 1.10  | 127.52      |
| hsa-mir-21.iso1      | AGCTTATCAGACTGATGTTGAC  | 28387.89             | 20802.53        | 93943.14        | 3.31        | 4.52  | 0.73  | 143133.55   |
| hsa-miR-7            | TGGAAGACTAGTGATTTTGTGT  | 9314.93              | 12290.97        | 28373.42        | 3.05        | 2.31  | 1.32  | 52390       |
| hsa-mir-944.iso1     | GAAATTATTGTACATCGGATGA  | 964.97               | 864.50          | 2936.55         | 3.04        | 3.40  | 0.90  | 4766.02     |
| hsa-miR-496          | TGAGTATTACATGGCCAATCTC  | 148.79               | 190.13          | 451.51          | 3.02        | 2.37  | 1.28  | 829         |
| hsa-miR-3065-5p      | TCAACAAAATCACTGATGCTGGA | 537.19               | 474.79          | 1622.60         | 3.02        | 3.41  | -1.13 | 2783        |
| hsa-miR-3614         | CCACTTGGATCTGAAGGCTGCC  | 61.27                | 65.13           | 183.42          | 2.96        | 2.79  | 1.06  | 326         |
| hsa-miR-592          | TTGTGTCAATATGCGATGATGT  | 54.70                | 77.73           | 161.38          | 2.92        | 2.06  | 1.41  | 307         |
| hsa-mir-378a.iso1    | CTGGACTTGGAGTCAGAAGGC   | 71843.34             | 92591.43        | 206610.53       | 2.88        | 2.23  | 1.29  | 371045.29   |
| hsa-miR-545*         | TCAGTAAATGTTTATTAGATGA  | 52.52                | 60.92           | 151.68          | 2.85        | 2.47  | 1.16  | 278         |
| hsa-miR-944          | AAATTATTGTACATCGGATGAG  | 8181.47              | 7959.04         | 23300.16        | 2.85        | 2.93  | -1.03 | 41477       |

|                     |                         |            |            |             |      |      |       |             |
|---------------------|-------------------------|------------|------------|-------------|------|------|-------|-------------|
| hsa-miR-200c*       | CGTCTTACCCAGCAGTGTTTGG  | 530.62     | 584.03     | 1485.03     | 2.80 | 2.54 | 1.10  | 2725        |
| hsa-miR-940         | AAGGCAGGGCCCCGCTCCCC    | 66.74      | 66.18      | 187.83      | 2.79 | 2.81 | -1.01 | 337         |
| hsa-miR-147b        | GTGTGCGGAAATGCTTCTGCTA  | 64.55      | 81.93      | 181.66      | 2.79 | 2.20 | 1.27  | 343         |
| miR-203-AS          | TTGAACTGTTAAGAACCACTGG  | 1657.52    | 2138.66    | 4597.95     | 2.77 | 2.15 | 1.29  | 8765        |
| hsa-miR-155         | TTAATGCTAATCGTGATAGGGGT | 18527.02   | 19220.60   | 50098.60    | 2.70 | 2.61 | 1.04  | 92043       |
| hsa-miR-378         | ACTGGACTTGAGTCAGAAGG    | 1308311.11 | 1659217.08 | 3504731.56  | 2.68 | 2.11 | 1.27  | 6749701     |
| hsa-miR-1303        | TTTAGAGACGGGGTCTTGCTCT  | 100.65     | 153.36     | 269.85      | 2.66 | 1.75 | 1.52  | 544         |
| hsa-miR-3176        | ACTGGCCTGGGACTACCGG     | 87.53      | 82.98      | 234.57      | 2.66 | 2.80 | -1.05 | 425         |
| hsa-miR-3613        | TGTTGTACTTTTTTTTTTGTTC  | 5674.95    | 5138.66    | 14804.44    | 2.61 | 2.88 | -1.10 | 26867       |
| hsa-miR-211         | TTCCCTTTGTCATCCTTCGCCT  | 3135.61    | 6034.67    | 8157.96     | 2.60 | 1.35 | 1.92  | 17862       |
| hsa-miR-4802        | TACATGGATGGAAACCTTCAAGC | 80.96      | 81.93      | 207.23      | 2.54 | 2.51 | 1.01  | 387         |
| hsa-mir-1307.iso1   | CTCGGCGTGGCGTGGTCTGG    | 1329.30    | 1212.19    | 3367.77     | 2.53 | 2.78 | 0.91  | 5909.26     |
| hsa-mir-155.iso1    | TAATGCTAATCGTGATAGGGG   | 169.58     | 161.76     | 428.58      | 2.53 | 2.65 | 0.95  | 759.92      |
| hsa-miR-142-3p      | TGTAGTGTTCCTACTTTATGGA  | 91176.69   | 77835.12   | 229401.86   | 2.52 | 2.95 | -1.17 | 417574      |
| hsa-mir-223.iso1    | GTCAGTTTGTCAAATACCCAA   | 1369.78    | 1656.51    | 3433.91     | 2.51 | 2.07 | 1.21  | 6460.20     |
| hsa-miR-455-3p      | GCAGTCCATGGGCATATACAC   | 12226.26   | 11781.52   | 30044.52    | 2.46 | 2.55 | -1.04 | 56461       |
| hsa-miR-18a         | TAAGGTGCATCTAGTGCAGATAG | 6729.64    | 7211.14    | 16350.32    | 2.43 | 2.27 | 1.07  | 31557       |
| hsa-miR-3150b       | TGAGGAGATCGTCGAGTTGGC   | 59.08      | 116.60     | 142.86      | 2.39 | 1.22 | 1.96  | 327         |
| Novel #116          | AAAGGACCTTGTGAGACGGAG   | 53.61      | 76.68      | 128.75      | 2.38 | 1.67 | 1.42  | 268         |
| hsa-miR-19b-1*      | AGTTTTGCAGTTTGCATCCAGC  | 273.52     | 388.66     | 649.04      | 2.37 | 1.67 | 1.42  | 1356        |
| hsa-miR-146a        | TGAGAACTGAATTCCATGGGTT  | 257981.11  | 310479.12  | 609439.89   | 2.36 | 1.96 | 1.20  | 1222470     |
| hsa-miR-188-5p      | CATCCCTTGCATGGTGGAGGG   | 630.19     | 668.07     | 1486.79     | 2.36 | 2.22 | 1.06  | 2898        |
| hsa-miR-376a*       | GTAGATTCTCCTTCTATGAGTA  | 1596.25    | 1683.82    | 3748.73     | 2.35 | 2.23 | 1.05  | 7313        |
| hsa-miR-665         | ACCAGGAGGCTGAGGCCCT     | 159.73     | 218.49     | 374.78      | 2.34 | 1.71 | 1.37  | 779         |
| hsa-miR-4423        | AGTTGCCTTTTTGTCCCATGC   | 59.08      | 131.30     | 139.33      | 2.34 | 1.06 | 2.20  | 337         |
| hsa-miR-548f        | AAAAACTGTAATTACTTTT     | 70.02      | 72.48      | 164.02      | 2.32 | 2.25 | 1.03  | 319         |
| hsa-miR-369-3p      | AATAATACATGGTTGATCTTT   | 3427.73    | 2759.45    | 7933.98     | 2.31 | 2.87 | -1.24 | 14757       |
| hsa-miR-449a        | TGGCAGTGTATTGTTAGCTGGT  | 119.25     | 157.56     | 276.02      | 2.30 | 1.75 | 1.32  | 572         |
| U60 miRNA-5p/snoRNA | AGTCTGTGATGAATTGCTTTGA  | 4673445.23 | 7641212.21 | 10813232.65 | 2.30 | 1.41 | 1.64  | 23127890.09 |
| hsa-miR-33a*        | CAATGTTTCCACAGTGCATCAC  | 582.05     | 689.08     | 1319.24     | 2.26 | 1.91 | 1.18  | 2684        |
| hsa-mir-142.iso1    | GTAGTGTTCCTACTTTATGG    | 28092.49   | 19933.83   | 63264.57    | 2.25 | 3.17 | 0.71  | 111290.89   |
| hsa-miR-33b         | GTGCATTGCTGTTGCATTGC    | 284.46     | 273.11     | 634.93      | 2.23 | 2.32 | -1.04 | 1240        |
| hsa-miR-18a*        | ACTGCCCTAAGTGCTCCTTCTGG | 253.82     | 367.65     | 565.26      | 2.22 | 1.54 | 1.45  | 1223        |
| hsa-miR-23a*        | GGGGTTCCTGGGGATGGGATTT  | 217.72     | 348.74     | 485.02      | 2.22 | 1.39 | 1.60  | 1081        |

|                      |                          |            |            |            |       |       |       |            |
|----------------------|--------------------------|------------|------------|------------|-------|-------|-------|------------|
| hsa-miR-223*         | CGTGTATTTGACAAGCTGAGTT   | 479.20     | 446.43     | 1050.28    | 2.19  | 2.35  | -1.07 | 2054       |
| hsa-miR-187          | TCGTGTCTTGTGTTGCAGCCGG   | 630.19     | 744.75     | 1371.27    | 2.17  | 1.84  | 1.18  | 2840       |
| hsa-miR-1276         | TAAAGAGCCCTGTGGAGACA     | 107.22     | 91.39      | 230.16     | 2.14  | 2.50  | -1.17 | 446        |
| hsa-miR-223          | TGTCAGTTTGTCAAATACCCCA   | 18027.03   | 17264.71   | 38451.16   | 2.13  | 2.23  | -1.04 | 76516      |
| hsa-miR-154*         | AATCATACACGGTTGACCTATT   | 261.48     | 239.50     | 557.33     | 2.13  | 2.32  | -1.09 | 1099       |
| hsa-mir-7.iso1       | AACAAATCACAGTCTGCCATA    | 176.15     | 185.92     | 373.90     | 2.12  | 2.01  | 1.06  | 735.97     |
| hsa-miR-487a         | AATCATACAGGGACATCCAGTT   | 370.89     | 432.77     | 785.73     | 2.12  | 1.81  | 1.17  | 1642       |
| hsa-miR-6515/miRtron | TTGGAGGGTGTGGAAGACATC    | 75.49      | 79.83      | 160.50     | 2.11  | 2.00  | 1.06  | 327        |
| hsa-miR-19b          | TGTGCAAATCCATGCAAACTGA   | 47813.14   | 45453.80   | 100637.24  | 2.10  | 2.21  | -1.05 | 201095     |
| hsa-miR-212          | TAACAGTCTCCAGTCACGGCC    | 251.64     | 226.89     | 525.58     | 2.08  | 2.31  | -1.11 | 1042       |
| hsa-miR-92a-1*       | AGGTTGGGATCGGTTGCAATGCT  | 354.48     | 436.97     | 731.05     | 2.06  | 1.67  | 1.23  | 1569       |
| hsa-miR-378*         | CTCCTGACTCCAGGTCCTGTGT   | 1417.92    | 1373.95    | 2899.51    | 2.04  | 2.11  | -1.03 | 5892       |
| hsa-mir-203.iso1     | TGAAATGTTTAGGACCACTAG    | 1828790.75 | 1919175.17 | 3728148.32 | 2.04  | 1.94  | 1.05  | 7476114.24 |
| hsa-miR-205*         | GATTTCACTGGAGTGAAGTTC    | 549.22     | 597.69     | 1118.18    | 2.03  | 1.87  | 1.09  | 2339       |
| hsa-miR-1308         | GCATGGGTGGTTCAGTGG       | 2130.16    | 2262.61    | 4330.75    | 2.03  | 1.91  | 1.06  | 9012       |
| hsa-miR-1307         | ACTCGGCGTGGCGTCCGGTCTGTG | 7732.90    | 6553.57    | 15201.27   | 1.97  | 2.32  | -1.18 | 30545      |
| hsa-miR-362-3p       | AACACACCTATTCAAGGATTCA   | 405.90     | 391.81     | 793.66     | 1.95  | 2.02  | -1.04 | 1644       |
| hsa-miR-6513/miRtron | TTTGGGATTGACGCCACATGTCT  | 74.30      | 82.93      | 143.86     | 1.94  | 1.73  | 1.12  | 301.09     |
| hsa-miR-590-3p       | TAATTTTATGTATAAGCTAGT    | 1237.40    | 886.55     | 2400.39    | 1.94  | 2.71  | -1.40 | 4697       |
| hsa-miR-19a          | TGTGCAAATCTATGCAAACTGA   | 2609.36    | 2141.81    | 4938.34    | 1.89  | 2.31  | -1.22 | 10024      |
| miRtron #323/miRtron | TCAGGGAGAAAGAAGGGTTATT   | 17.41      | 11.50      | 32.75      | 1.88  | 2.85  | -1.67 | 61.66      |
| hsa-miR-3065-3p      | TCAGCACCAGGATATTGTTGGAG  | 562.35     | 480.04     | 1044.99    | 1.86  | 2.17  | -1.17 | 2156       |
| hsa-miR-377          | ATCACACAAAGGCAACTTTTGT   | 912.46     | 768.91     | 1651.70    | 1.81  | 2.15  | -1.19 | 3439       |
| hsa-miR-376b         | ATCATAGAGGAAAATCCATGTT   | 716.62     | 582.98     | 1241.64    | 1.73  | 2.13  | -1.23 | 2618       |
| hsa-miR-509-5p       | TACTGCAGACAGTGGCAATCA    | 352.29     | 720.59     | 567.91     | 1.61  | -1.27 | 2.04  | 1652       |
| hsa-miR-542-3p       | TGTGACAGATTGATAACTGAAA   | 5650.88    | 3641.81    | 7399.58    | 1.31  | 2.03  | -1.55 | 17023      |
| hsa-miR-2110         | TTGGGGAAACGGCCGCTGAGTG   | 1932.13    | 2987.40    | 1227.53    | -1.57 | -2.43 | 1.55  | 6002       |
| hsa-miR-4520a        | TTGGACAGAAAACACGCAGGA    | 1284.44    | 1554.62    | 746.92     | -1.72 | -2.08 | 1.21  | 3501       |
| hsa-miR-486-5p       | TCCTGTAAGAGTGGCAGTCGA    | 134809.38  | 148860.36  | 74411.99   | -1.81 | -2.00 | 1.10  | 349315     |
| hsa-miR-628-3p       | TCTAGTAAGAGTGGCAGTCGA    | 587.52     | 689.08     | 313.94     | -1.87 | -2.19 | 1.17  | 1549       |
| hsa-miR-1179         | AAGCATTCTTTCATTGGTTGG    | 152.08     | 86.13      | 74.96      | -2.02 | -1.15 | -1.76 | 306        |
| hsa-miR-99a          | AACCCGTAGATCCGATCTTGTG   | 400593.41  | 260932.88  | 195318.48  | -2.05 | -1.34 | -1.54 | 836045     |
| hsa-mir-628.iso1     | TTCTAGTAAGAGTGGCAGTCGA   | 192.56     | 245.80     | 92.59      | -2.08 | -2.65 | 1.28  | 530.95     |
| hsa-miR-3617-5p      | AAAGACATAGTTGCAAGATGGG   | 246.17     | 263.66     | 117.29     | -2.09 | -2.24 | 1.07  | 609        |

|                         |                          |            |           |           |       |       |       |           |
|-------------------------|--------------------------|------------|-----------|-----------|-------|-------|-------|-----------|
| hsa-miR-6508-3p         | TGGGCCATGCATTTCTAGAACT   | 135.66     | 114.50    | 64.37     | -2.09 | -1.77 | -1.18 | 306       |
| Novel #333              | TCTCTGCCGGCTTGATGGGCTAGC | 164.11     | 131.30    | 77.60     | -2.10 | -1.68 | -1.25 | 363       |
| has-miR-1468            | CTCCGTTTGCCTGTTTCGCTG    | 133.48     | 105.04    | 59.97     | -2.21 | -1.74 | -1.27 | 290       |
| hsa-mir-10a.iso1        | ACCCTGTAGATCCGAATTTGTG   | 295988.08  | 194267.94 | 131798.17 | -2.25 | -1.47 | -1.52 | 622054.19 |
| hsa-miR-6500-3p         | ACACTTGTGGGATGACCTGC     | 275.71     | 191.18    | 119.05    | -2.30 | -1.60 | -1.44 | 569       |
| hsa-miR-10a             | TACCCTGTAGATCCGAATTTGTG  | 1435203.78 | 942025.60 | 621943.60 | -2.31 | -1.51 | -1.52 | 2913882   |
| hsa-miR-100             | AACCCGTAGATCCGAACTTGTG   | 838053.76  | 608920.42 | 362352.60 | -2.31 | -1.68 | -1.38 | 1756589   |
| hsa-miR-137             | TTATTGCTTAAGAATACGCGTAG  | 529.53     | 419.12    | 223.11    | -2.37 | -1.87 | -1.26 | 1136      |
| hsa-miR-181a-2*         | ACCACTGACCGTTGACTGTACC   | 20226.11   | 18849.80  | 8401.35   | -2.41 | -2.24 | -1.07 | 45959     |
| hsa-miR-375             | TTTGTTTCGTTCCGGCTCGCGTGA | 16394.67   | 14909.67  | 6790.22   | -2.41 | -2.20 | -1.10 | 36879     |
| hsa-miR-5010-5p/miRtron | AGGGGGATGGCAGACAAAATT    | 99.56      | 146.01    | 40.56     | -2.42 | -3.54 | 1.46  | 276       |
| hsa-miR-5010-3p/miRtron | TTTTGTGTCTCCCATTCGCCAG   | 28.35      | 33.56     | 11.58     | -2.43 | -2.86 | 1.18  | 73.49     |
| hsa-mir-181a.iso1       | ACATTCACGCTGTCGGTGAG     | 2390.55    | 1255.25   | 970.03    | -2.46 | -1.29 | -1.90 | 4615.83   |
| hsa-miR-885-5p          | TCCATTACACTACCCTGCCTCT   | 393.87     | 358.19    | 153.44    | -2.56 | -2.33 | -1.10 | 875       |
| hsa-miR-486-3p          | CGGGGCAGCTCAGTACAGGAT    | 933.24     | 861.34    | 363.32    | -2.56 | -2.37 | -1.08 | 2085      |
| hsa-miR-129-5p          | CTTTTTGCGGTCTGGGCTTGC    | 913.55     | 1569.33   | 347.45    | -2.62 | -4.51 | 1.72  | 2723      |
| hsa-mir-375.iso1        | TTGTTCGTTCCGGCTCGCGTGA   | 444.19     | 373.95    | 158.73    | -2.80 | -2.36 | -1.19 | 976.88    |
| hsa-miR-483-3p          | TCACTCCTCTCCTCCCGTCTT    | 159.73     | 87.18     | 53.79     | -2.93 | -1.61 | -1.82 | 290       |
| hsa-miR-6510-3p/miRtron | CACCGACTCTGTCTCCTGCAG    | 3080.91    | 2169.12   | 1057.33   | -2.94 | -2.04 | -1.43 | 6080      |
| hsa-mir-486.iso1        | CCTGTAAGGCTGCCCCGAG      | 797.58     | 486.34    | 264.55    | -3.01 | -1.84 | -1.64 | 1548.48   |
| hsa-miR-6721-5p/miRtron | TGGGCAGGGGCTTATTGTAGGA   | 34.92      | 20.96     | 10.70     | -3.23 | -1.96 | -1.67 | 66.58     |
| hsa-mir-100.iso1        | ACCCGTAGATCCGAACTTGT     | 5351.11    | 2860.30   | 1566.16   | -3.42 | -1.83 | -1.87 | 9777.56   |
| hsa-miR-5089-5p         | TGGGATTTCTGAGTAGCATCC    | 143.32     | 141.81    | 37.04     | -3.79 | -3.75 | -1.01 | 308       |
| hsa-miR-548az-5p        | AAAAGTGATTGTGGTTTTTGTCT  | 212.25     | 192.23    | 50.27     | -4.16 | -3.77 | -1.10 | 434       |
| hsa-miR-675*            | CTGTATGCCCTCACCGCTCA     | 387.30     | 173.32    | 86.42     | -4.44 | -1.99 | -2.23 | 617       |
| hsa-miR-124             | TAAGGCACGCGGTGAATGCC     | 2829.27    | 1455.88   | 481.49    | -5.87 | -3.02 | -1.94 | 4518      |
| hsa-miR-4490            | TCTGGTAAGAGATTTGGGCAT    | 184.90     | 138.66    | 22.05     | -8.07 | -6.06 | -1.33 | 326       |

<sup>3</sup>Normal skin, NN; psoriatic uninvolved skin, PN; psoriatic Involved skin, PP.
